# Supplementary material for: Bioinformatics investigation of the prognostic value and mechanistic role of CD9 in glioma
Source: PubMed Central journal article supplement — Sci Rep. 2024 Oct 18;14:24502. doi: 10.1038/s41598-024-74109-w (PMC11489571; doi:10.1038/s41598-024-74109-w), 2024-10-18
Supplement: 41598_2024_74109_MOESM2_ESM.pdf [file 41598_2024_74109_MOESM2_ESM.pdf]

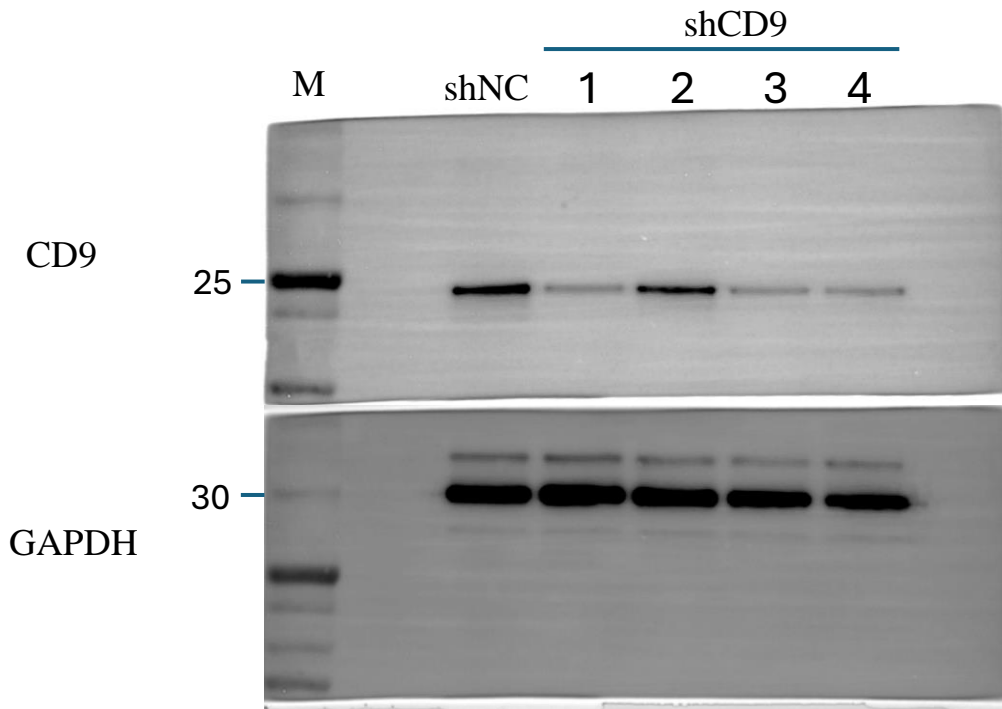

Figure S1. western blot analysis of CD9 abundance in vector-control cells (shNC) and CD9 short hairpin cells (shCD9). M, protein molecular weight markers
